1 **A neural basis for the spatial suppression of visual motion perception**

2 Liu D. Liu<sup>1</sup>, Ralf M. Haefner<sup>2</sup> & Christopher C. Pack<sup>1</sup>

3

4 <sup>1</sup>Department of Neurology and Neurosurgery, Montreal Neurological Institute, McGill

5 University, Montreal, Quebec H3A 2B4, Canada

6 <sup>2</sup>Department of Brain and Cognitive Sciences, University of Rochester, Rochester, NY 14627-

7 0268

8

9 Correspondence: [christopher.pack@mcgill.ca](mailto:christopher.pack@mcgill.ca)

10

11 **Abstract**

12 In theory, sensory perception should be more accurate when more neurons contribute to the  
13 representation of a stimulus. However, psychophysical experiments that use larger stimuli to  
14 activate larger pools of neurons sometimes report impoverished perceptual performance. To  
15 determine the neural mechanisms underlying these paradoxical findings, we trained monkeys to  
16 discriminate the direction of motion of visual stimuli that varied in size across trials, while  
17 simultaneously recording from populations of motion-sensitive neurons in cortical area MT. We  
18 used the resulting data to constrain a computational model that explained the behavioral data as  
19 an interaction of three main mechanisms: noise correlations, which prevented stimulus  
20 information from growing with stimulus size; neural surround suppression, which decreased  
21 sensitivity for large stimuli; and a read-out strategy that emphasized neurons with receptive  
22 fields near the stimulus center. These results suggest that paradoxical percepts reflect tradeoffs  
23 between sensitivity and noise in neuronal populations.

## 24 **Introduction**

25 Perception relies on the spiking responses of sensory neurons. Indeed, individual neurons can  
26 exhibit exquisite selectivity for specific stimulus features. However, this single-neuron  
27 selectivity is of limited utility for stimulus encoding for two reasons. One is that neuronal  
28 responses are modulated by multiple stimulus dimensions, so that identical responses can be  
29 associated with very different stimuli. Another reason is that single-neuron responses can be  
30 quite variable, so that the response to the same stimulus can differ from one presentation to the  
31 next.

32         Some of this variability can be reduced by combining the responses of multiple neurons.  
33 If the variability is independent across neurons, it can be eliminated by simply averaging the  
34 responses of many neurons. In this case, the available information about the stimulus  
35 theoretically increases with neuronal population size (1, 2). However, in reality neuronal noise is  
36 usually correlated across nearby neurons, and such *noise correlations* are thought to greatly  
37 influence on the fidelity of a population code (3-7). Still, current theories predict the stimulus  
38 information will increase or saturate as the size of the corresponding neuronal pool increases.

39         One simple way to manipulate the neuronal pool size is to change the physical size of a  
40 visual stimulus. Because neurons in early visual structures have small receptive fields, large  
41 stimuli recruit more neurons, potentially leading to more effective coding of stimulus properties  
42 and correspondingly better behavioral performance. It is therefore surprising that behavioral  
43 studies in humans have sometimes found that larger stimuli are associated with diminished  
44 perceptual performance (8). Moreover, this *psychophysical suppression* of behavioral  
45 performance in human subjects is strongly correlated with various markers of mental function,  
46 including schizophrenia, major depression, and even I.Q (9-11). These results have previously

47 been hypothesized to reflect the strength of neuronal surround suppression in individual cortical  
48 neurons (8, 12), but it is unclear how such suppression affects neuronal populations, particularly  
49 in the presence of noise correlations.

50 To address this issue, we recorded from small populations of neurons in visual cortical  
51 area MT, in macaque monkeys trained to report the perceived direction of a moving stimulus.  
52 We varied stimulus size randomly from trial to trial, and found, as reported in human studies (8),  
53 that increased stimulus size led to a drastic deterioration of behavioral performance. Our  
54 neurophysiological recordings revealed that the magnitude of the neuronal surround suppression  
55 of *individual* neurons is too small to account for psychophysical suppression. However, analysis  
56 of multi-electrode recordings revealed a novel aspect of neuronal noise correlations that further  
57 suppressed population coding for large stimuli: those neurons with the smallest surround  
58 suppression, and hence the ones most sensitive to large stimuli individually, also had noise  
59 correlations most closely aligned with signal correlations; such correlations are damaging to the  
60 total information carried by the population (3, 6). These mechanisms, combined with  
61 conservative assumptions about the animals' behavioral strategies (13-15), provided a full  
62 account of the observed psychophysical suppression. These results further our understanding of  
63 the relationship between neural activity and perception, in normal and pathological states.

64

## 65 **Results**

66 In the standard model of perceptual decision-making (16), the responses of a population of  
67 sensory neurons are assumed to be read out by a decision-making area. For a linear read-out, this  
68 system is well-understood, and the key drivers of psychophysical performance are the  
69 sensitivities of the individual sensory neurons to the task-relevant stimulus dimension, their

70 response variability, and the correlation structure in the population (1, 3, 4, 7, 17). Since these  
71 quantities generally depend on the particular stimulus used for the task (18) and the demands of  
72 the task itself (19), we performed simultaneous recordings from populations of MT neurons  
73 while two monkeys performed a task for which psychophysical surround suppression has  
74 previously been demonstrated in humans (8).

75 In the remainder of this section we will first describe the psychophysical results, followed  
76 by our neurophysiological measurements. We then use the neurophysiological data to constrain a  
77 comprehensive model that can account for the observed pattern of psychophysical suppression.

78

### 79 *Psychophysical measurements*

80 We examined neuronal responses and behavioral performance during a task in which the visual  
81 stimulus size was varied across trials (**Fig. 1A, C**) (8). During the task, monkeys viewed drifting  
82 Gabor grating stimuli and reported their percepts of visual motion direction (20, 21) (**Fig. 1C**).  
83 As in most human studies, we used a very brief stimulus duration (50 ms) (8) in order to increase  
84 the difficulty of the task. In preliminary behavioral experiments we also compared  
85 psychophysical performance using Gabor patches of low (4%) and high (100%) contrast. Based  
86 on the dependency of the density of receptive fields on eccentricity in early visual structures (22,  
87 23), we calculated that the number of visual cortical neurons activated by our stimulus should  
88 increase with stimulus size (**Fig. 1B**).

89 Consistent with previous findings in humans (8), we found that increasing the size of a  
90 low-contrast stimulus improved behavioral performance (**Fig. 1D**, dashed lines), while under  
91 high-contrast conditions, behavioral performance worsened at larger sizes (**Fig. 1D**, solid lines).  
92 Thus, paradoxically, psychophysical performance was best for stimuli of medium intensity, with

93 performance declining as contrast and size were increased (**Fig. 1D**, Wilcoxon rank sum test,  $P <$   
94 0.001).

95 To quantify this effect, we computed a psychophysical suppression index ( $SI_{\text{psy}}$ ) (**Fig. 1D**  
96 and Material and Methods), which captures the decrease in performance (on a scale from 0 to 1,  
97 with 0 corresponding to no suppression, and 1 to complete suppression) for large stimuli relative  
98 to the best performance across all stimuli. At 100% contrast, the  $SI_{\text{psy}}$  of the psychometric  
99 function (mean  $\pm$  s.d.) was  $0.42 \pm 0.25$  for monkey C and  $0.54 \pm 0.19$  for monkey Y, indicating  
100 that monkeys were approximately half as likely to accurately perceive the motion of a large  
101 stimulus, compared to a small one.

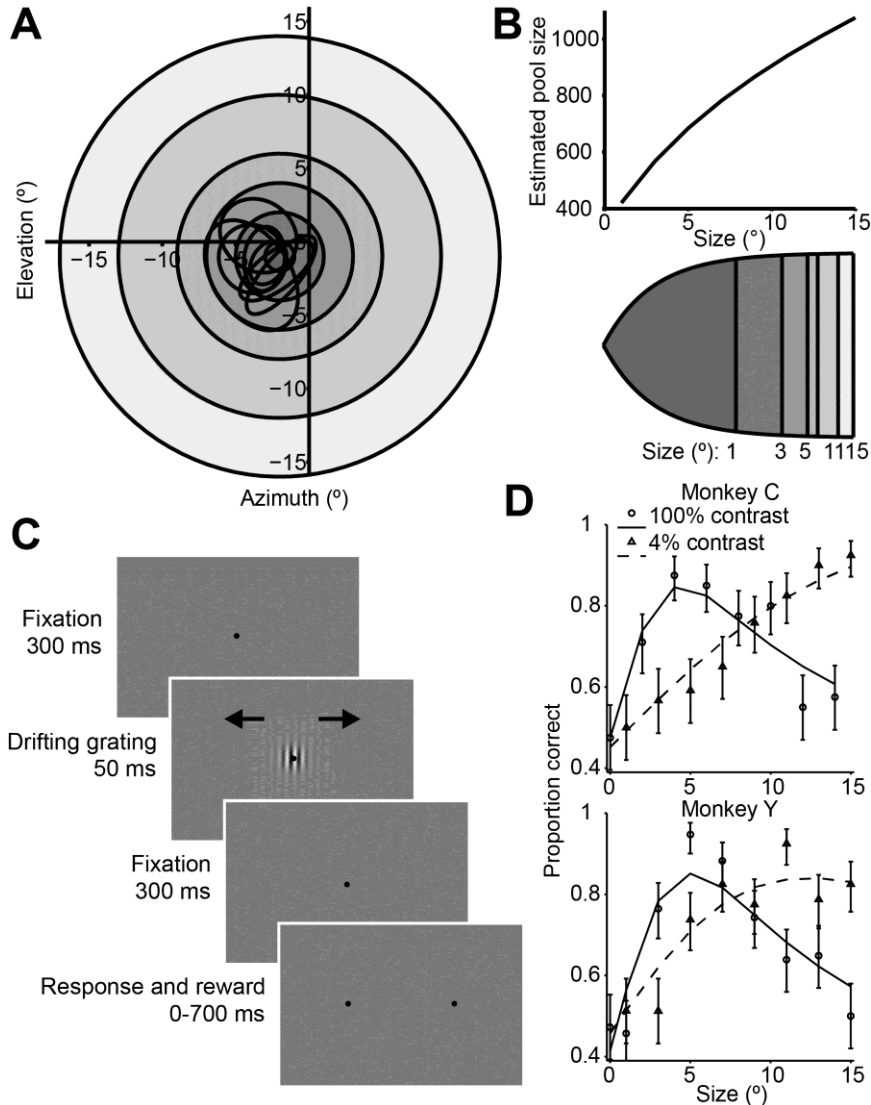

102  
 103 **Fig. 1.** Stimuli, sequence of events, and behavioral performance in the task. **(A)** Receptive fields  
 104 from an example recording session, shown as black ovals, relative to lines of different visual  
 105 eccentricity (gray circles) commensurate with the stimulus sizes used in the experiments. **(B)** The  
 106 estimated neuron pool size as a function of stimulus size, for the eccentricities and stimulus sizes  
 107 used in the experiments (top). Cortical mapping of visual space from **(A)**, showing that larger  
 108 stimuli projected onto larger extents of cortical space (bottom). The sizes of the shaded areas  
 109 correspond to the estimated cortical footprint (see Materials and Methods). **(C)** Behavioral task.  
 110 The animals were required to maintain fixation in a 2° window for 300 ms, after which a drifting  
 111 Gabor appeared briefly. Animals were then required to fixate for another 300 ms until the  
 112 fixation spot disappeared. The animals then indicated their motion percept with an eye  
 113 movement to one of two targets within 700 ms. **(D)** Examples of the animals' psychometric  
 114 functions for high contrast (solid line, circles) and low contrast (dashed line, triangles) stimuli.  
 115 Error bars represent 95% binomial proportion confidence interval.  
 116

117 *Neurophysiological measurements*

118 We recorded from small populations of neurons in MT using linear electrode arrays, while  
119 monkeys performed the high-contrast motion discrimination task described above. Area MT is  
120 thought to be causally involved in behavioral decisions for motion direction (24), and it contains  
121 many neurons with responses that are modulated by stimulus size and contrast (25, 26). To  
122 maximize the number of stimulus repetitions per recording session, we fixed the stimulus  
123 contrast at 100% and varied stimulus size across trials. We analyzed data from 165 single units,  
124 with 2-8 cells being available on any given day.

125

126 *Relationship between single-neuron selectivity and behavior*

127 The responses of an example MT neuron to stimuli centered on the receptive field are shown in  
128 **Fig. 2A**. Here the red and blue dots show the responses to the preferred and null direction  
129 stimuli, and these responses decrease slightly with increasing stimulus size. The distributions of  
130 these responses across trials can be converted into a single measure of neuronal selectivity,  $d'$ ,  
131 which is plotted as a function of stimulus size in **Fig. 2B**. Based on this *neurometric function*, we  
132 can compute a neural measure of suppression,  $SI_{neu}$ , which is defined analogously to  $SI_{psy}$ . The  
133 value of  $SI_{neu}$  for this neuron was 0.18, which indicates a modest suppression of motion signaling  
134 by large stimuli.

135         The decrease in neuronal selectivity with stimulus size resembles the psychophysical  
136 performance of the monkey (**Fig. 2B**). However, the strength of neuronal surround suppression is  
137 substantially less than that of the simultaneously measured psychophysical suppression (0.54).  
138 This was often the case in our data: For the MT population, the mean neuronal  $d'$  ( $SI_{neu} = 0.27$ )  
139 was much less suppressed than the mean psychometric  $d'$  ( $SI_{psy} = 0.48$ , **Fig. 2D**). Moreover,

140 many neurons exhibited no surround suppression at all, even for stimuli extending beyond their  
141 receptive fields (27), and the selectivity of these neurons to large stimuli routinely exceeded that  
142 of the monkeys (**Fig. 2B, C**). This was especially clear in neurons with receptive fields near the  
143 edges of the larger stimuli (**Fig. 2-figure supplement 1B**); in these neurons responses increased  
144 with stimulus size (**Fig. 2-figure supplement 1C**). Together these results suggest that the  
145 psychophysical performance is not solely driven by typical single-neuron selectivity, as only a  
146 small fraction of neurons showed suppression comparable to that of the behavior.

147         One caveat to this conclusion is that subjects might have relied more heavily on a  
148 subpopulation of MT neurons to form their perceptual decisions. Indeed, if neurons with strong  
149 surround suppression exerted a greater influence on perception, perhaps by virtue of anatomical  
150 connectivity (28, 29), then psychophysical suppression would presumably increase accordingly.  
151 However, using choice probability analysis (21, 30, 31), we found no evidence that neurons with  
152 strong surround suppression were more correlated with the animals' behavior choices; indeed the  
153 correlation between  $SI_{neu}$  and choice probability was modestly negative (**Fig. 2E**;  $r = -0.14$ ,  $P =$   
154  $0.04$ ).



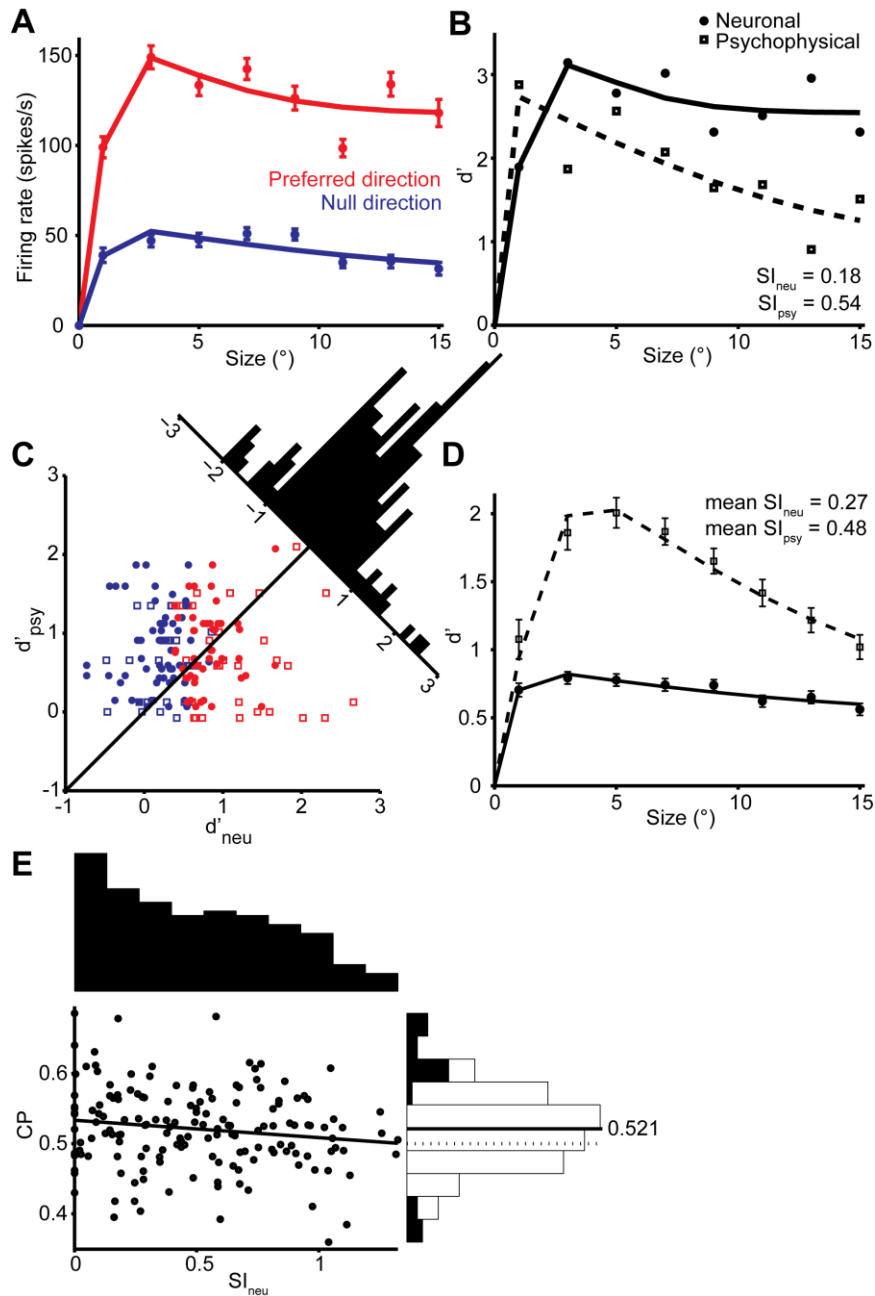

155  
 156 **Fig. 2.** Quantification of single neuron selectivity for an example MT neuron, and the summary  
 157 for the population. (A) Size tuning curves, plotting the firing rate (mean  $\pm$  s.e.m.) for the  
 158 preferred (red) and null (blue) direction stimuli as a function of Gabor patch size. The lines  
 159 indicate difference of error functions fits. (B) Neurometric function (filled symbols) for the  
 160 example neuron plotting the  $d'$  value as a function of stimulus size. The corresponding  
 161 psychometric function is superimposed (open symbols). Solid and dashed lines indicate  
 162 difference of error functions fits. The psychophysical performance differs from Fig. 1D since the  
 163 stimulus was tailored to the neural population measured on any one day. (C) Scatter plot of the  
 164 psychophysical  $d'$  against the neuronal  $d'$  at the largest stimulus size. Filled circles represent  
 165 monkey C ( $n = 105$ ), and open squares represent monkey Y ( $n = 60$ ). Red represents neurons  
 166 with weak surround suppression, and blue represents neurons with strong surround suppression.

167 The distribution of  $d'_{neu}-d'_{psy}$  is shown at the diagonal. **(D)** The mean  $d'_{psy}$  as a function of size  
 168 from all sessions (monkey C:  $n = 28$ , monkey Y:  $n = 11$ ) superimposed with the mean single  
 169 neuron  $d'_{neu}$  from all MT neurons (165 single neurons). Error bars denote s.e.m. **(E)** Population  
 170 summary of choice probability (CP). Scatter plot of CP against the suppression index of the  
 171 neurometric function. Filled symbols represent CP values that are significantly different from 0.5  
 172 ( $P < 0.05$ , permutation test). Solid line indicates linear fit ( $r = -0.14$ ,  $P = 0.04$ ). The marginal  
 173 distributions of  $SI_{neu}$  and CP are shown on the top and the right. Filled and open bars indicate  
 174 neurons with significant and non-significant choice probabilities, respectively.  
 175

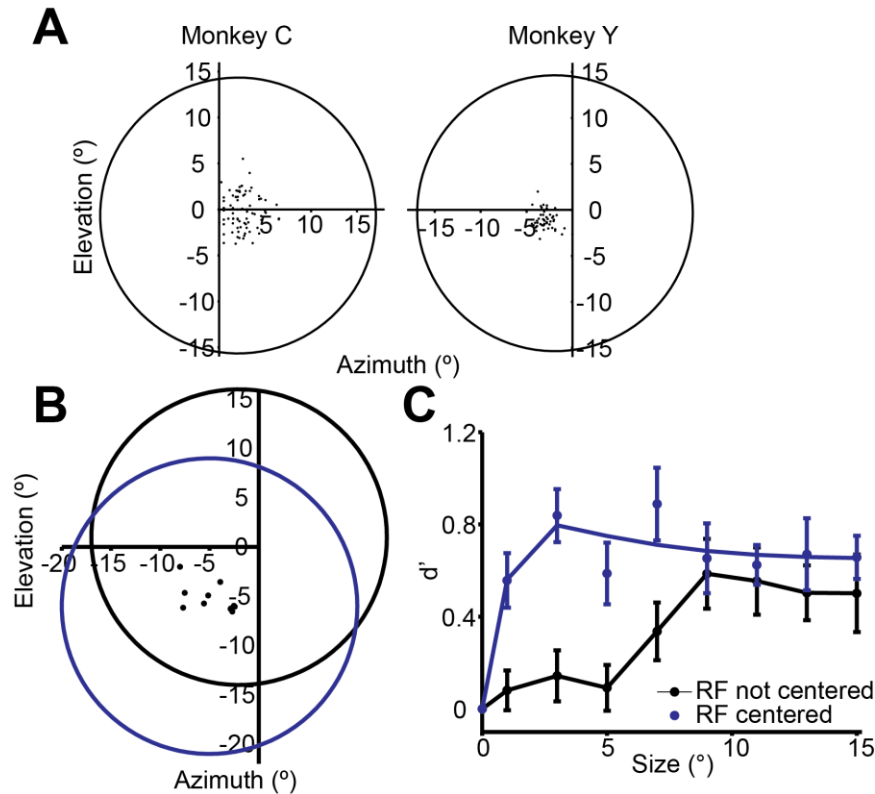

176 **Fig. 2-figure supplement 1.** **(A)** RF positions of the neurons recorded. The dots are RF centers  
 177 for the MT neurons from each animal. The circles indicate the average placement of the stimulus  
 178 centers. Maximal stimulus radius is 15°. **(B)** The dots represent the centers of the RFs of off-  
 179 stimulus center neurons simultaneously recorded using the foveal stimulus for the motion  
 180 direction discrimination task (black circle), and when the stimulus was centered on the RFs (blue  
 181 circle). **(C)** Single neuron selectivity of peripheral neurons when the foveal stimulus was not  
 182 centered on the RFs (black), and when the stimulus was centered on the RFs (blue).  
 183

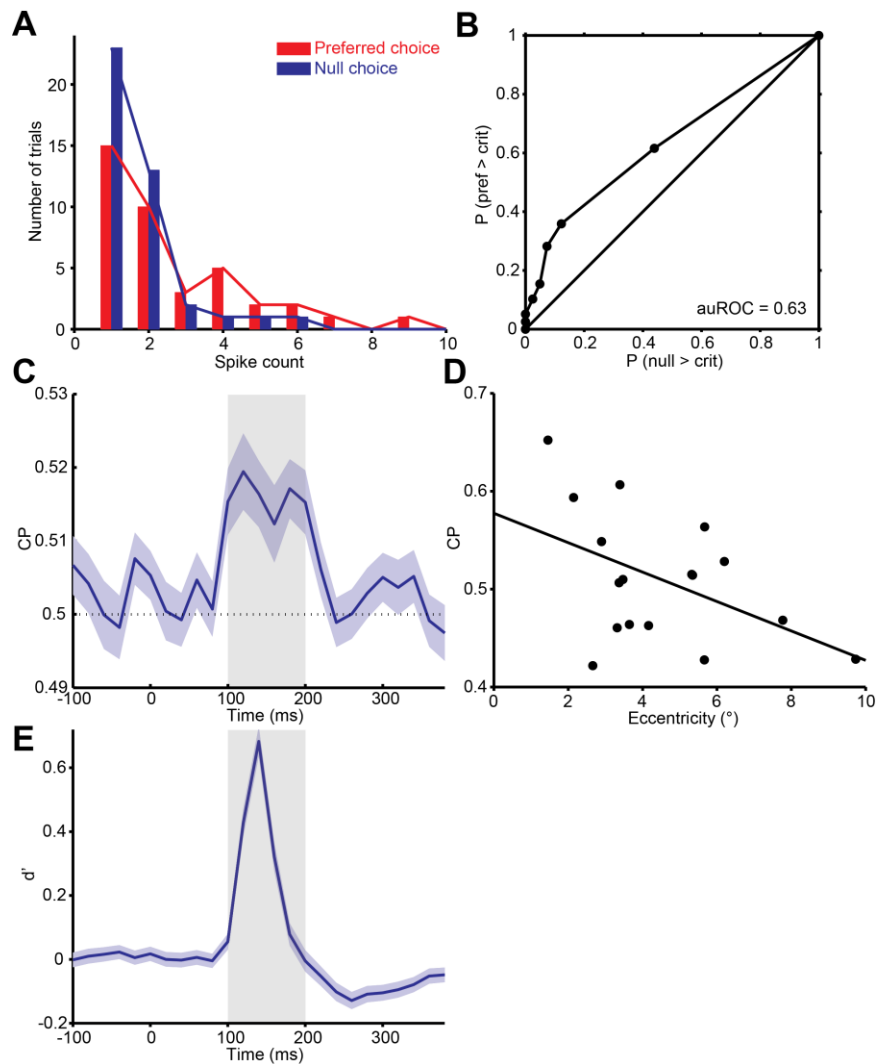

184  
185 **Fig. 2-figure supplement 2.** Quantification of choice probability (CP) of single neurons and the  
186 time course of CP. (A) Distributions of firing rates of an MT neuron, grouped according to the  
187 monkey's choice of preferred or null direction motion. (B) The ROC curve of the distributions  
188 yielded a significant choice probability of 0.63 ( $P = 0.010$ , permutation test). (C) Mean CP  
189 across the population was calculated in 20 ms bins. CP was significantly above 0.5 from  
190 approximately 100 to 200 ms after stimulus onset ( $P < 0.01$ , permutation test). (D) Scatter plot of  
191 CP against eccentricity of the neurons. Solid line indicates linear fit ( $r = -0.48$ ,  $P = 0.05$ ). (E)  
192 Mean  $d'$  across the population was calculated in 20 ms bins.

193  
194 *Noise correlation measurements*

195 The mean levels of noise correlations were typically on the order of 0.1 ( $0.099 \pm 0.007$ ),  
196 compatible with previous reports (1, 32, 33). Their strength was independent of motion direction  
197 or stimulus size (Wilcoxon rank sum test for direction, 94% of experiments with  $P > 0.05$ ; for  
198 smaller and larger sizes,  $P = 0.55$  Fig. 4-figure supplement 1A).

199           Next, we considered the relationship between noise correlations and tuning curve  
200 similarity; these have been found to correlate in previous studies (32, 33). **Fig. 3A** shows the  
201 responses of two example neurons that were recorded simultaneously; each dot represents the  
202 mean response to a preferred (red) or null (blue) direction stimulus, with different dots  
203 corresponding to responses to different stimulus sizes. The responses of these neurons exhibit a  
204 clear signal correlation ( $r_{\text{signal}} = 0.61$ ). **Fig. 3B** shows trial-by-trial data from the same pair of  
205 neurons; here the responses have been z-scored to remove changes in the mean due to different  
206 stimulus sizes or directions (1). The remaining dependency reflects noise correlations in the  
207 responses of the two neurons ( $r_{\text{noise}} = 0.21$ ). The relationship illustrated by this example pair is  
208 characteristic of the population (**Fig. 4A**), across which noise correlations and signal correlation  
209 are significantly correlated ( $r = 0.32$ ,  $P < 0.001$ ).

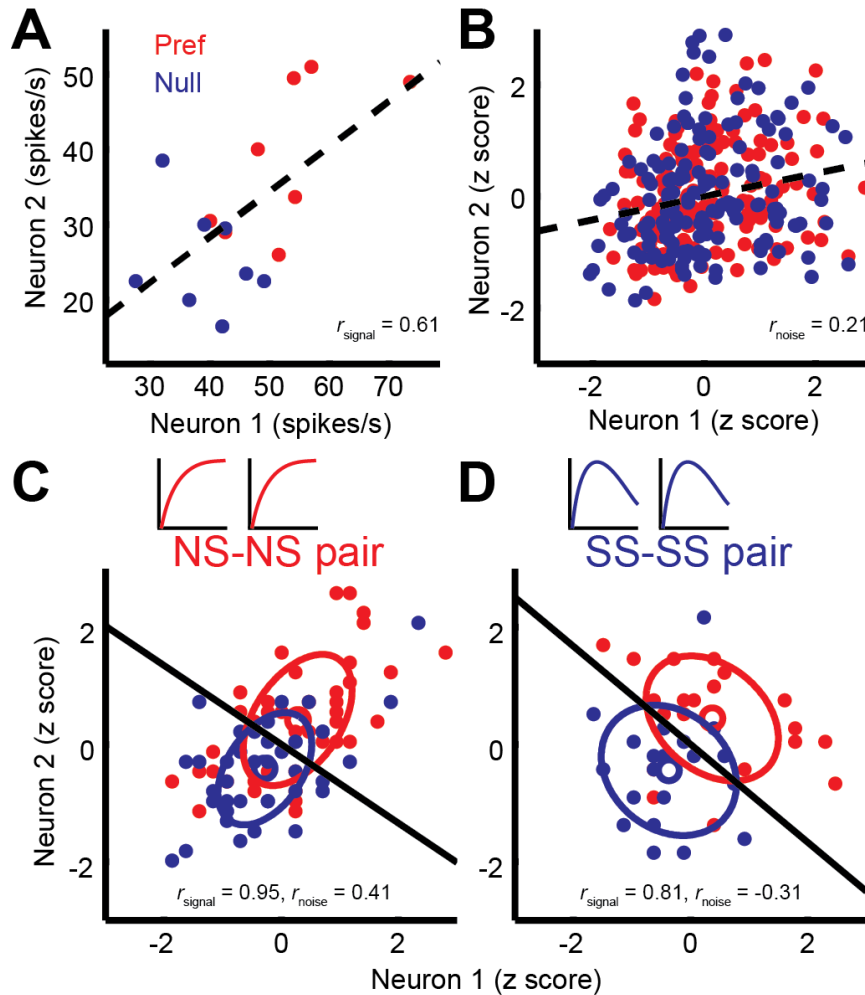

210  
211 **Fig. 3.** Quantification of noise correlation ( $r_{\text{noise}}$ ) and signal correlation ( $r_{\text{signal}}$ ) between neuron  
212 pairs. **(A)** The mean responses of the two simultaneously recorded neurons across both directions  
213 and sizes.  $r_{\text{signal}}$  (0.61) is the Pearson correlation coefficient of the mean responses for the  
214 conditions. **(B)** The responses for each stimulus condition were z scored across the repetitions,  
215 and each point represents a response from one trial.  $r_{\text{noise}}$  (0.21) is the Pearson correlation  
216 coefficient of the entire dataset. The dashed lines represent linear fits. **(C, D)** Response  
217 correlations for an NS-NS pair and an SS-SS pair for one example stimulus size ( $1^\circ$ ).  
218

219 Interestingly, we find that this *correlation structure* appears to be different for pairs of  
220 neurons with different levels of surround suppression. This is apparent in the examples shown in  
221 **Fig. 3.** To study this relationship across the population ( $N = 370$  pairs), we classified neurons as  
222 surround suppressed (SS) or not (NS), based on a simple median split of the  $SI_{\text{neu}}$  distribution  
223 (34) (**Fig. 2C**). This yielded three types of neuron pairs: both suppressed (SS-SS), both non-  
224 suppressed (NS-NS), and mixed (SS-NS). Across the population, the magnitudes of  $r_{\text{noise}}$  were

225 not significantly different across types of neuron pairs (Wilcoxon rank sum tests,  $P > 0.86$ ).  
226 However, the correlation structure differed substantially for different cell classes: For the NS-NS  
227 pairs,  $r_{\text{noise}}$  and  $r_{\text{signal}}$  tended to be correlated (**Fig. 4A**, red dots). By contrast pairs of SS neurons  
228 showed less of a dependency of noise correlation on signal correlation (**Fig. 4A**, blue dots). The  
229 difference in the slopes of the lines relating signal and noise correlations was significantly lower  
230 for the SS pairs than for the NS pairs (ANCOVA,  $P = 0.03$ , multiple comparison test) (**Fig. 4A**,  
231 red and blue lines). For NS-SS pairs, this dependency was intermediate (**Fig. 4A**, black line).

232 We performed several control analyses to verify that these results reflected a genuine  
233 difference in correlation structure across cell types. First, we recalculated  $r_{\text{signal}}$  using direction  
234 tuning curves that were measured for a fixed stimulus size. This controlled for any variation in  
235  $r_{\text{signal}}$  that arose from differences in the size-tuning functions of NS and SS neurons. The results  
236 (**Fig. 4-figure supplement 1D**) were similar to those in **Fig. 4A** (ANCOVA,  $P = 0.04$ , multiple  
237 comparison test). Second, we verified that these results were not due to changes in firing rate  
238 across the different cell types, as the mean firing rates of NS-NS pairs (median = 39.1) and SS-  
239 SS pairs (median = 36.4) were not significantly different (Wilcoxon rank sum test,  $P = 0.45$ ).  
240 Also, sampling from rate-matched sub-distributions of SS-SS and NS-NS pairs (Materials and  
241 Methods) yielded significantly higher  $r_{\text{noise}}$  vs.  $r_{\text{signal}}$  slopes for the NS-NS sub-distributions (**Fig.**  
242 **4B**; Wilcoxon rank sum test,  $P < 0.001$ ). Finally, the reduction of this  $r_{\text{noise}}$  dependency did not  
243 depend on the categorical classification of SS and NS neurons, as we obtained similar results  
244 using continuous values of the joint  $SI_{\text{neu}}$  for pairs of neurons (**Fig. 4-figure supplement 1C**;  
245 linear correlation: ( $r = -0.232$ ,  $P < 0.0001$ ). This finding suggests that the correlated variability  
246 between two neurons with similar stimulus preferences may largely arise from the same inputs  
247 that are responsible for surround suppression in those neurons.

248 Differential correlations (17) between neurons  $i$  and  $j$  are those that are proportional to  
249  $f_i' f_j'$ , where  $f_i$  denotes the tuning function of neuron  $i$ , and the prime denotes the derivative with  
250 respect to the task-relevant direction in stimulus space; such correlations will limit the  
251 information carried even for arbitrarily large neural populations (17). We calculated differential  
252 correlations for all neuronal pairs, and found that there is indeed a positive relationship between  
253 noise correlations and  $f' f'$  (**Fig. 4-figure supplement 1E**). Furthermore, we find the same  
254 difference between SS-SS and NS-NS pairs as reported above (**Fig. 4A**): the magnitude of the  
255 information-limiting correlations is greater between NS-NS pairs than between SS-SS pairs (**Fig.**  
256 **4-figure supplement 1E**,  $r_{NS-NS} = 0.48$ ,  $r_{SS-SS} = 0.23$ ,  $P = 0.08$ ). In brief, while NS neurons are  
257 individually more informative for large stimuli than SS neurons, as a population they are more  
258 limited by their correlation structure than SS neurons.

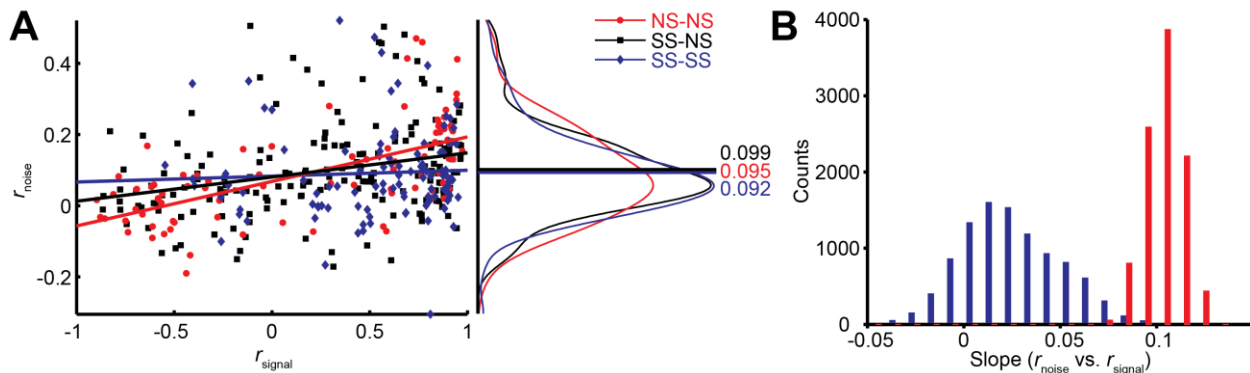

259  
260 **Fig. 4.** Relationship between noise correlation ( $r_{\text{noise}}$ ) and signal correlation ( $r_{\text{signal}}$ ). (A) Scatter  
261 plot of  $r_{\text{noise}}$  versus  $r_{\text{signal}}$  for pairs of SS and SS (blue), SS and NS (black), and NS and NS (red)  
262 neurons. Lines represent linear regression fits. Marginal distributions of  $r_{\text{noise}}$  are also shown  
263 (right panel). Lines and numbers mark the mean values of  $r_{\text{noise}}$  for each combination of neuron  
264 pairs. (B) Sampling from rate matched sub-distributions of SS-SS and NS-NS pairs gives similar  
265 differences in  $r_{\text{noise}}$  vs.  $r_{\text{signal}}$  slope.  
266

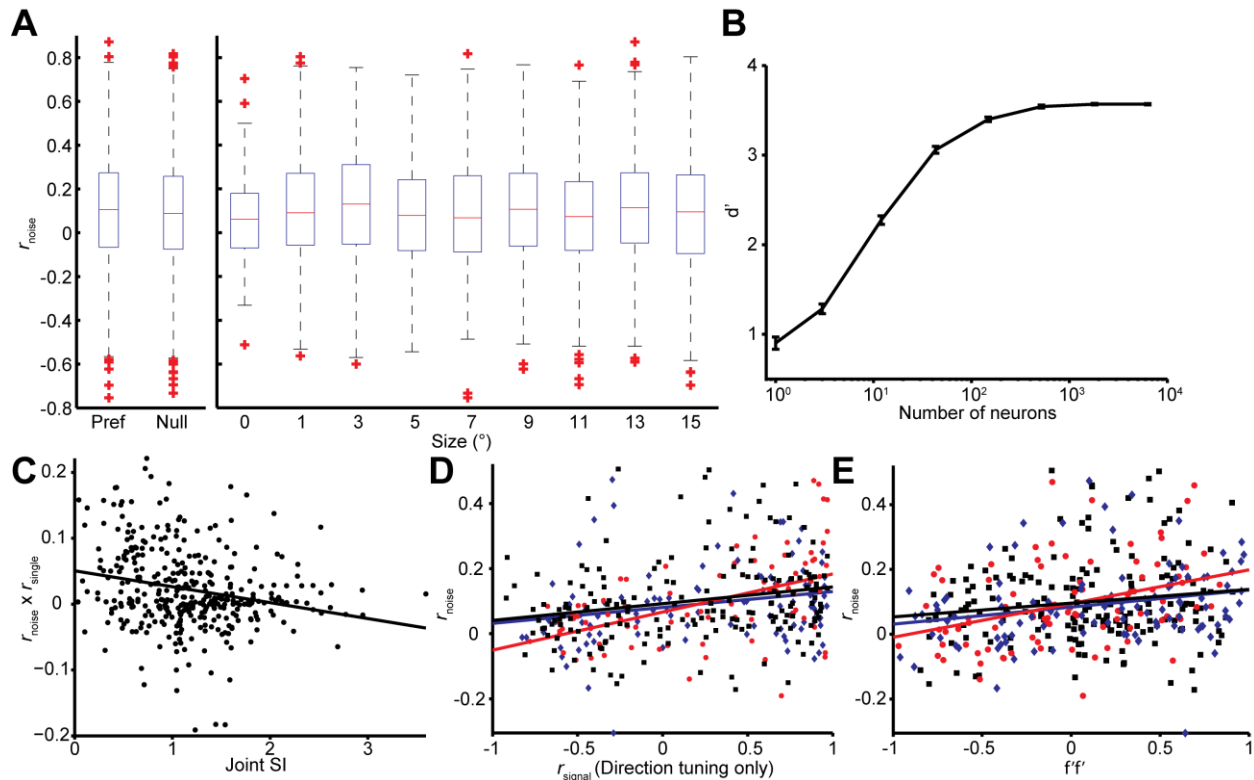

267

268 **Fig. 4-figure supplement 1.** Effects of stimulus conditions, firing rate, and tuning similarity on  
 269 the  $r_{\text{noise}}$  on  $r_{\text{signal}}$  dependency. **(A)** Box-whiskers plots of the value of  $r_{\text{noise}}$  across stimulus  
 270 conditions. The value of  $r_{\text{noise}}$  is not significantly different between the preferred and null  
 271 directions (Wilcoxon rank sum test,  $P = 0.07$ ), and smaller and larger sizes (Wilcoxon rank sum  
 272 test,  $P = 0.55$ ). **(B)** Population selectivity as a function of number of neurons include. Only the  
 273 single neuron selectivity at the smallest stimulus size is considered with the mean noise  
 274 correlation structure observed. **(C)** The joint SI for each neuron pair ( $n = 370$ ), determined as the  
 275 sum of the individual SIs, plotted against the product of  $r_{\text{noise}}$  and  $r_{\text{signal}}$  for the pair. For the latter,  
 276 we first subtracted off the mean  $r_{\text{noise}}$  and  $r_{\text{signal}}$  to isolate the covariance of the two measures.  
 277 Large positive values correspond to neuron pairs in which  $r_{\text{noise}}$  and  $r_{\text{signal}}$  have the same sign, as  
 278 expected for NS-NS pairs (**Fig. 4A**). Small values indicate no consistent relationship between  
 279  $r_{\text{noise}}$  and  $r_{\text{signal}}$ , as expected for the SS-SS pairs (**Fig. 4A**). A linear regression (solid line)  
 280 confirms a negative relationship between joint SI and the dependency of noise correlations on  
 281 signal correlations ( $r = -0.232$ ,  $P < 0.001$ ). **(D)** A similar  $r_{\text{noise}}$  vs.  $r_{\text{signal}}$  relationship was observed  
 282 when  $r_{\text{signal}}$  was calculated using separately measured direction tuning curves. **(E)** A similar  $r_{\text{noise}}$   
 283 vs.  $f'f'$  relationship was observed when  $f'$  was calculated using the difference between the  
 284 preferred and null direction responses.

285

## 286 *Modeling results*

287 Based on our empirical measurements described above, we devised a model to investigate to

288 which degree each aspects of the neural data contributed to the observed psychophysical



289 behavior. Such modeling is naturally limited by the impossibility of measuring the relevant  
290 properties of all the sensory neurons involved in processing the stimuli. Thus we accounted for  
291 this uncertainty explicitly by examining a large number of models from a joint probability  
292 distribution over parameters corresponding to the properties of the MT population response (e.g,  
293 firing rates, noise correlations, direction tuning bandwidth, etc.). From each model, we extracted  
294 a prediction of behavioral performance for different stimulus sizes, so that for each model we  
295 could compute its predicted psychophysical suppression. A detailed description of the modeling  
296 approach is given in the Methods (see also **Fig. 5-figure supplement 1**).

297         In order to relate our simulated neural responses to behavioral performance (**Fig. 5A**) we  
298 used a standard linear read-out in which a weighted average of the responses is compared to a  
299 decision-threshold (2, 16, 31, 35, 36). We made the assumption of a factorial decoder (**Fig. 5B**),  
300 in which the read-out weight for each neuron only depends on the properties of that neuron itself,  
301 for two primary reasons: First, such a set of read-out weights can be learned easily since each  
302 weight only depends on the properties of the individual neuron itself (37), and second, it has  
303 recently received empirical support (36). (We also performed our analysis using an optimal  
304 linear read-out, as well as one in which each neuron's weight depended only on its sensitivity to  
305 the stimulus and not its variability, and obtained qualitatively similar results – see Supplementary  
306 Information, **Fig. 5-figure supplement 2**). Since the stimulus size in our experiment is  
307 randomized, and since the duration is extremely brief (50 ms), we furthermore assume that the  
308 read-out is fixed and does not adjust dynamically to the stimulus size. We initially limited the  
309 read-out to neurons with receptive fields within  $5^\circ$  of the stimulus center; we examine the impact  
310 of this choice below.

311 Figure 5C shows the average performance over 100 runs of this model. As in the  
312 behavioral data, we find that performance decreases for larger stimuli. The suppression shown by  
313 the model is of the same magnitude as the empirical behaviour (**Fig. 5E**, black), with the model  
314 SI being 0.48 (**Fig. 5C, E** cyan). To understand the source of this suppression, we performed  
315 additional analyses in which key components of the model were removed: Specifically, we  
316 considered models in which (1) noise correlations were absent; (2) correlations were as  
317 measured, but surround suppression was absent; and (3) correlations and surround suppression  
318 were on average as measured, but the observed relationship between them (**Fig. 4A**) was  
319 missing. We found that both the noise correlation structure and surround suppression were  
320 necessary to account for the decreased performance as a function of size, since models (1) and  
321 (2) did not show any psychophysical suppression at all (SI = 0; data not shown). However, these  
322 components together were not sufficient to account for the observed behavioral results, since  
323 model (3) exhibited only modest psychophysical suppression (SI = 0.28; **Fig 5C, E** magenta).  
324 Thus the relationship between surround suppression and correlation structure appears to have  
325 important consequences for motion perception.

326 From Figure 5C (cyan) it is apparent that the surround-suppression-dependent correlation  
327 structure has two separate effects on performance: One is a suppression of motion signal for  
328 large sizes. Perhaps more surprising is an increase in performance seen for small stimuli (**Fig.**  
329 **5C, E**). This suggests that the combined effect of correlation structure and surround suppression  
330 is an increase in the capacity of the MT population to discriminate the direction of very small  
331 stimuli, at the expense of large stimuli (see Discussion).

332 The preceding analyses suggests that psychophysical suppression is due to a combination  
333 of two known aspects of neural coding, surround suppression and noise correlations. Equally

334 important is novel interaction between these two factors, wherein the correlation between  
335 neurons depends on their respective surround suppression (**Fig. 4A**). To arrive at these  
336 conclusions, we assumed that the animals used a fixed read-out, focusing on neurons with  
337 receptive fields near the center of the stimuli. To determine the importance of this assumption,  
338 we ran model simulations in which the integration radius was varied (**Fig. 5D**). Unsurprisingly  
339 the SI decreased with increasing integration radius, dropping to 0.26 when the radius was  $15^\circ$ ,  
340 which is significantly less than that exhibited psychophysically by the monkeys (**Fig. 5E** green,  
341 Wilcoxon rank sum test,  $P < 0.001$ ). The overall model performance, obtained by summing the  
342 performance across all sizes, was, however, unaffected by this parameter (ANOVA,  $P = 0.25$ ).  
343 This is due to the fact that a larger integration radius increases the performance at large sizes,  
344 while decreasing the performance at small sizes (**Fig. 5C**). This suggests that behavioral SI could  
345 vary substantially according to the internal strategies used by the observer.

346

347

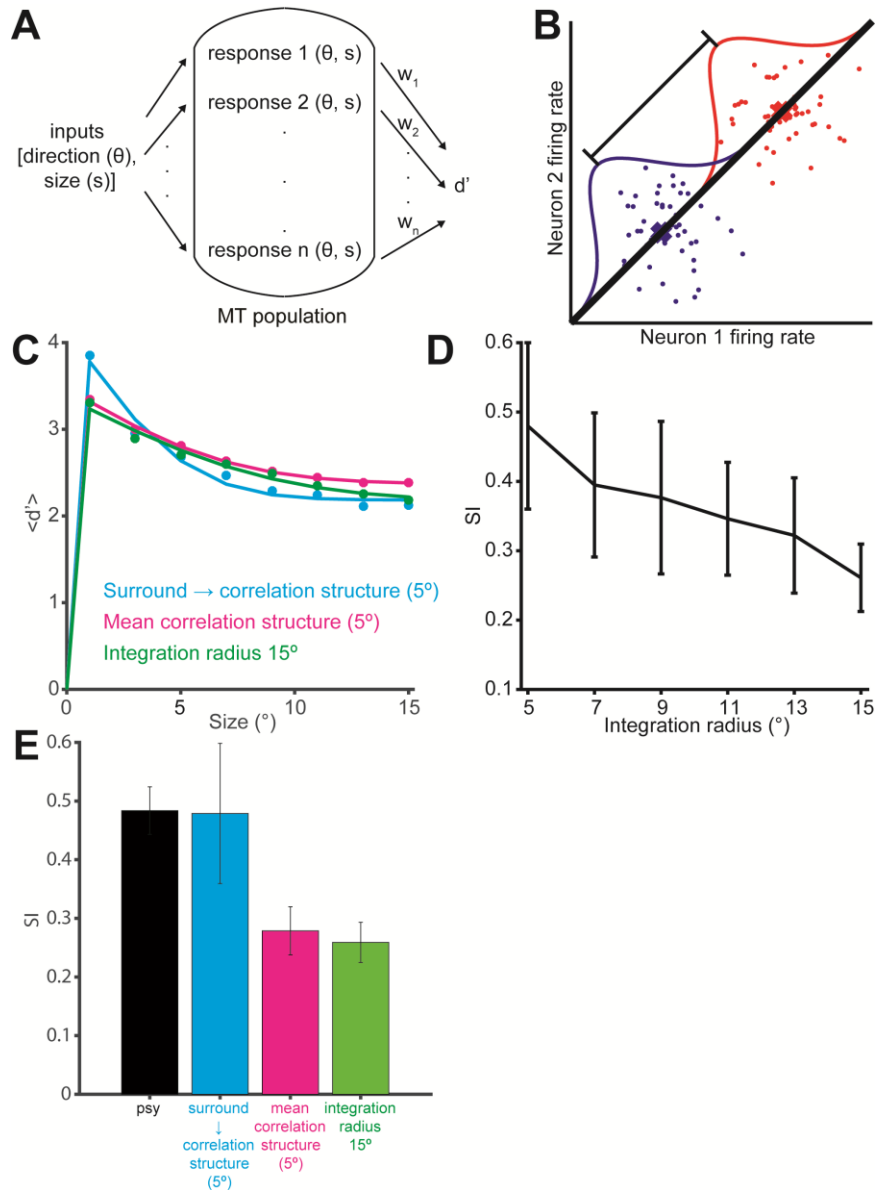

348

349 **Fig. 5.** Simulation of population selectivity and model comparisons. (A) Schematic of the  
 350 population selectivity simulation. The preferred and null responses were sampled from the  
 351 distribution of parameters recorded. We tested combinations of different correlation structures  
 352 and readout weights. (B) Calculation of the population selectivity. Each point represents the  
 353 response from a trial from  $n$  neurons (here,  $n = 2$ ). The one-dimensional distributions for the  
 354 preferred and null direction responses were generated by projecting the points onto the  
 355 normalized axis that connects the mean responses in  $n$ -dimensional space (factorial read-out).  
 356 The calculation of population  $d'$  then follows the equation in the Materials and Methods. (C) The  
 357 predicted population neuronal selectivity plotted as a function of the stimulus size for each  
 358 model. Data points represent averages across 100 iterations of the simulation, with each iteration  
 359 based on a different re-sampling of the parameter set from the original data sets. Results are  
 360 shown for the full model based on all empirical measurements in which surround suppression  
 361 modulates noise correlation structure (cyan); a model where correlations and surround

362 suppression were on average as measured, but the observed relationship between them was  
 363 missing (magenta), and finally the full model again, but with integration radius of 15° (green).  
 364 (D) SI of population d' for simulations where increasing number of neurons with peripheral  
 365 receptive fields are included. The x-axis indicates the integration window for including neurons'  
 366 receptive fields relative to the stimulus center. Error bars denote standard deviation. (E)  
 367 Comparison of the SI of different simulations: colors as in C. Error bar for the psychophysical  
 368 data denotes s.e.m., and error bars for the model predictions denote standard deviation.  
 369

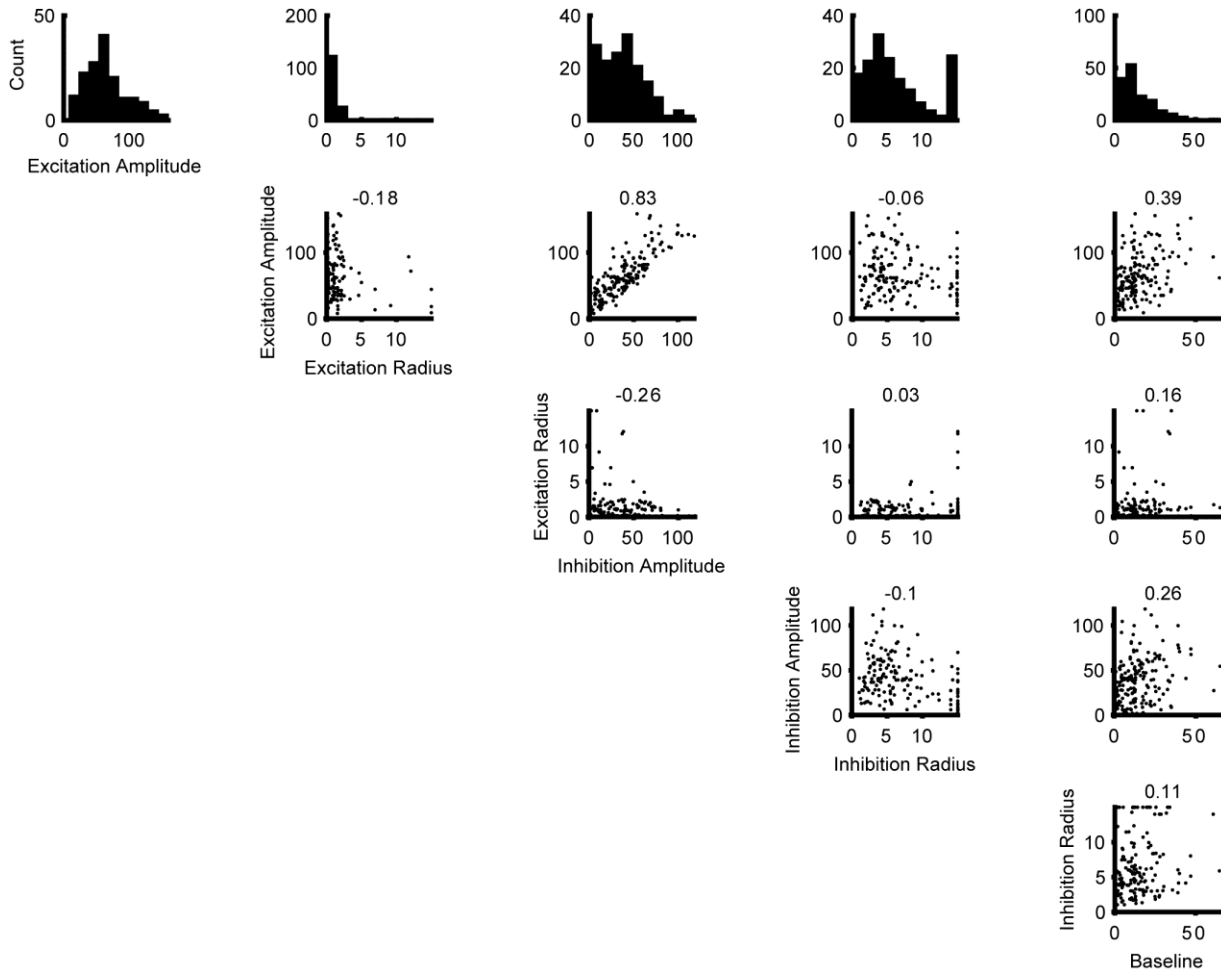

370  
 371 **Fig. 5-figure supplement 1.** Distributions of the parameters for the Difference of Error functions  
 372 fits. The histograms at the top row are the distribution of the parameters. The scatter plots shows  
 373 the correlation of the parameters. The numbers at the top of each scatter plot are the Pearson  
 374 correlation coefficients. Together these are used to create a multivariate Gaussian copula that is  
 375 subsequently truncated to have only positive parameter values.  
 376

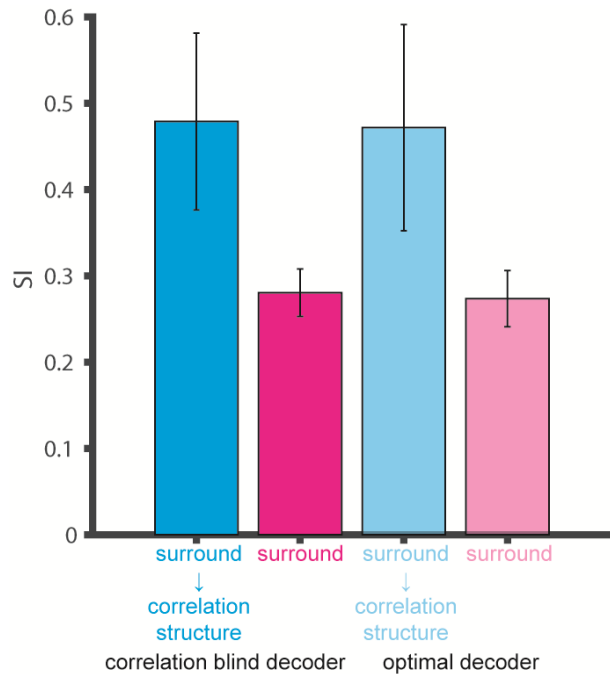

377  
378 **Fig. 5-figure supplement 2.** Comparison of the SI of different decoders: Surround suppression  
379 modulation of noise correlation structure (cyan), noise correlation structure with no surround  
380 suppression modulation (magenta) from Fig 5E using the factorial versus optimal decoders. Error  
381 bars denote standard deviation.  
382

### 383 Discussion

384 Using multi-electrode recordings in combination with a behavioral task, we have examined the  
385 effects of stimulus size on population coding. Consistent with previous work (1, 33, 38), we find  
386 that pairs of MT neurons exhibit modest noise correlations, with typical correlation coefficients  
387 near 0.10. We also find that the strength of noise correlations is related to the strength of signal  
388 correlations and that this relationship limits the benefit of increasing stimulus size on population  
389 coding. Moreover, we find that the correlation structure is not constant across MT neuron pairs,  
390 but rather is related to the strength of a seemingly unrelated variable, surround suppression. This  
391 relationship between signal correlations, noise correlations, and stimulus selectivity appears to  
392 have two important effects on visual perception: Large stimuli are encoded poorly because of a  
393 strong decrease in selectivity for surround-suppressed neurons, and undesirable noise  
394 correlations in non-suppressed neurons. Meanwhile small stimuli are encoded more effectively

395 because of the combination of strong direction selectivity and advantageous correlation structure  
396 in surround-suppressed MT neurons. Below we suggest that this population size tuning might  
397 have important implications for perception and behavior.

398

### 399 *Comparison to previous studies of noise correlations*

400 Surround suppression has often been hypothesized to reduce correlations in natural inputs (18,  
401 39). We find that neurons with strong surround suppression can exhibit larger or smaller noise  
402 correlations, depending on the strength of their signal correlations. This relationship holds for all  
403 stimuli, even those that do not engage the receptive field surrounds strongly.

404 Previous studies have shown that the magnitude of  $r_{\text{noise}}$  is not fixed, but can be reduced  
405 by adaptation (40), learning (41), and attention (42, 43). The latter is particularly relevant,  
406 because attention increases the effective contrast of the stimulus (44), which also increases  
407 surround suppression (45) and decreases correlations (46). Thus a single mechanism (47) may  
408 account for the effects of attention and surround suppression on noise correlations, as  
409 implemented with divisive normalization (48, 49). Attention is also of interest because, like  
410 surround suppression, it can increase or decrease the strength of noise correlations, depending on  
411 the stimulus encoding of the neuron pairs (50). These differential effects on positive and negative  
412 noise correlations are particularly important in MT, where negative correlations are quite  
413 common (1, 33). Negative correlations likely arise from motion-opponent mechanisms, in which  
414 the outputs of neurons with opposite direction tuning are subtracted. Such effects are stronger in  
415 MT than in V1 (51), and they play an important role in decision-making models (2, 38).

416 The results shown in Figure 5D suggest that incorporating the responses of a limited  
417 number of the MT neurons also contributed to psychophysical suppression. In a technical sense

418 such a strategy is suboptimal (15), as subjects could probably have performed better by making  
419 use of the neurons with receptive fields near the edges of the stimulus. Although we have no  
420 direct measure of the actual readout strategy used by the subjects, we suggest that the limited  
421 sampling used here is a more realistic model of the neural decision process, for several reasons.  
422 First, recall (**Fig. 1C**) that stimuli sizes were randomly interleaved, so that motion information  
423 was always present in central locations, but for peripheral locations it was only present for large  
424 stimuli. Previous work suggests that subjects allocate resources according to the uncertainty  
425 associated with individual stimulus positions (13), so that monkeys in our task likely made  
426 greater use of neurons with receptive fields positioned near the center of the stimulus. In  
427 addition, although the subjects could have used neurons with receptive fields positioned near the  
428 edge of the stimulus to extract additional information about the motion of large stimuli (52), we  
429 found instead that choice probability decreased with receptive field eccentricity (**Fig. 2-figure**  
430 **supplement 2D**;  $r = -0.48$ ,  $P = 0.05$ ). This suggests that the monkeys likely based their decisions  
431 on neurons with receptive fields closer to the center of the stimulus, where motion information  
432 was present reliably on every trial. It would therefore be interesting to study psychophysical  
433 suppression in a paradigm in which the stimulus location was unpredictable from trial to trial.  
434 We predict that psychophysical suppression would be reduced in this case, as would overall  
435 performance across sizes (53).

436 A related possibility is that the subjects made use of a suboptimal decoding strategy (17,  
437 36). Indeed our analyses were based on a standard factorial decoder (3, 4, 7), which ignores  
438 correlation structure and hence loses information. We have reanalyzed our results using an  
439 optimal linear decoder (17, 36, 54), and found that this approach does improve performance in



440 general. However, the main conclusions with respect to correlation structure and its dependence  
441 on surround suppression are unchanged (**Fig. 5-figure supplement 2**).

442

#### 443 *Perceptual correlates of surround suppression*

444 The paradoxical decline in motion perception with increasing stimulus size, first observed in  
445 human psychophysics (8), has often been attributed to neuronal surround suppression at the level  
446 of MT. Indeed, transcranial magnetic stimulation (TMS) that targets MT reduces the spatial  
447 suppression effect (55). However, the TMS protocols used to modulate spatial suppression are  
448 inhibitory, and so one might just as easily interpret these results as an effect on noise correlations  
449 (56). This interpretation is consistent with our results, assuming that inhibitory connectivity plays  
450 a role both in generating surround suppression and in regulating noise correlations (48, 57, 58).

451 The distinction is important in interpreting a large body of data showing reduced spatial  
452 suppression in certain human populations. Examples include people with schizophrenia (9), and  
453 older individuals (59). Although these subjects may have deficits in GABAergic efficacy (9, 59),  
454 our results suggest that the connection to psychophysical spatial suppression could also be  
455 through noise correlations, as these are necessary to produce any effect of neural surround  
456 suppression at the population level.

457

#### 458 *Optimal encoding of small stimuli and pursuit targets*

459 Our simulation results suggest that surround suppression can increase the selectivity of the  
460 neuronal population to the smallest stimulus size in this task, while worsening the selectivity at  
461 larger sizes (**Fig. 5C**; note performance for the 1° stimulus). Therefore, one benefit of surround  
462 suppression might be in the tracking of small moving stimuli. Indeed, activity in clusters of

463 surround-suppressed neurons has been found to be causally linked to the tracking of small targets  
464 in smooth pursuit (28).

465         The link between MT activity and smooth pursuit initiation has been further strengthened  
466 by the finding that neuronal variability in MT can account for the majority of motor variation in  
467 smooth pursuit (60, 61). These observations have led to the suggestion that correlation structure  
468 in MT might limit the precision of pursuit initiation (33). Our results suggest that such  
469 comparisons should take into account the center-surround properties of individual MT neurons,  
470 as the neurons that seem to contribute most directly to pursuit initiation (28) exhibit more  
471 advantageous correlation structure (**Fig. 4A**). As a result, the pursuit initiation system might  
472 benefit from averaging the activity of many surround-suppressed MT neurons. This would explain  
473 both the weak correlation between single-neuron MT activity and pursuit and the relatively low  
474 choice probability of surround suppressed neurons in our perception task (**Fig. 2E**).

475         It is interesting in this regard that some models of smooth pursuit initiation (61) involve  
476 both a motion opponency step and a normalization operation. Normalization in these models  
477 serves the function of computing a vector average of the MT population response, and it also  
478 affects the levels of noise correlations in a manner that accounts for trial-to-trial fluctuations in  
479 behavior. Our results suggest the additional function of reshaping the selectivity of the MT  
480 population response in such a way as to favor the motion of small stimuli, precisely as would be  
481 expected for a system that initiates orienting responses to moving objects in a natural  
482 environment (62).

483 **Materials and Methods**

484

485 *Subjects and apparatus*

486 Two adult female rhesus monkeys (*Macaca mulatta*, both 7 kg) were used for  
487 electrophysiological recordings in this study. Before training, under general anesthesia, an MRI-  
488 compatible titanium head post was attached to each monkey's skull. The head posts served to  
489 stabilize their heads during subsequent training and experimental sessions. For both monkeys,  
490 eye movements were monitored with an EyeLink1000 infrared eye tracking system (SR  
491 Research) with a sampling rate of 1,000 Hz. Visual motion stimuli were displayed at 60 Hz at  
492 1,280 by 800 pixels resolution; the viewing area subtended  $60^\circ \times 40^\circ$  at a viewing distance of 50  
493 cm. The sizes of the Gabor patches were defined by 2 standard deviations of the Gaussian  
494 envelope and ranged from  $1^\circ$  to  $15^\circ$  in steps of  $2^\circ$ . All procedures conformed to the regulations  
495 established by the Canadian Council on Animal Care and were approved by the Institutional  
496 Animal Care Committee of the Montreal Neurological Institute.

497

498 *Electrophysiological recordings*

499 Area MT was identified based on an anatomical MRI scan, as well as depth, prevalence of  
500 direction-selective neurons, receptive field size to eccentricity relationship, and white matter to  
501 grey matter transition from a dorsal-posterior approach. We recorded single units used linear  
502 microelectrode arrays (V-Probe, Plexon) with 16 contacts. Neural signals were thresholded  
503 online, and spikes were assigned to single units by a template-matching algorithm (Plexon MAP  
504 System). Offline, spikes were manually sorted using a combination of automated template

505 matching, visual inspection of waveform, clustering in the space defined by the principle  
506 components, and absolute refractory period (1 ms) violations (Plexon Offline Sorter).

507

### 508 *Stimulus and Discrimination task*

509 Animals were trained to perform coarse motion direction discrimination tasks with Gabor  
510 patches. The structure of an individual trial is illustrated in **Fig. 1C**. Each trial began with the  
511 onset of a fixation point. The monkey was required to establish and maintain fixation within a  $2^\circ$   
512  $\times 2^\circ$  window for 300 ms, after which a drifting Gabor patch appeared on the receptive field  
513 centers. The parameters of the Gabor patch were matched to the multi-unit preferences for spatial  
514 position, preferred direction, and spatiotemporal frequency (**Fig. 1A** and **Fig. 2-figure**  
515 **supplement 1A**). The range of stimulus sizes ( $0\text{-}15^\circ$  radius at  $2.3 \pm 0.5^\circ$  eccentricity) was chosen  
516 to straddle the receptive field sizes ( $2.2 \pm 1.1^\circ$  radius at  $3.2 \pm 1.3^\circ$  eccentricity) of the recorded  
517 neurons (**Fig. 1A** and **Fig. 2-figure supplement 1A**).

518 The motion stimulus was presented for a brief period (typically 50 ms), after which the  
519 monkey was required to maintain fixation for another 300 ms. The fixation point then  
520 disappeared, and two choice targets appeared, after which the monkey made a saccade to the  
521 corresponding target to report its perceived motion direction (preferred or null relative to the  
522 neuron isolated). The monkey was required to indicate its decision within 700 ms following the  
523 onset of the choice targets. Correct choices were rewarded with a drop of liquid. If fixation was  
524 broken at any time during the stimulus, the trial was aborted. In a typical session, the monkeys  
525 performed 20-40 repetitions of each distinct stimulus.

526

### 527 *Data analysis*

528 The psychophysical  $d'$  was calculated as

$$529 \quad d'_{psy} = Z_{hit\ rate} - Z_{false\ alarm\ rate}$$

530 where the hit and false alarm rates were z-transformed with zero mean and unit variance.

531 The neuronal  $d'$  was calculated as

$$532 \quad d'_{neu} = \frac{\mu_{pref} - \mu_{null}}{\sqrt{\frac{\sigma_{pref}^2 + \sigma_{null}^2}{2}}}$$

533 where  $\mu_{pref}$  and  $\mu_{null}$  are the means of the preferred and null direction responses, and  $\sigma_{pref}^2$  and  
534  $\sigma_{null}^2$  are the variances (63). To quantify the neuronal selectivity of both the single neurons and  
535 the population, we used the firing rate during the 100-200 ms interval after stimulus onset to  
536 calculate the  $d'$ . This interval was chosen because the firing rates in response to the preferred and  
537 null directions were significantly different (**Fig. 2-figure supplement 2E**;  $P < 0.05$ , t-test), and  
538 spikes during this time window were significantly correlated with the animals' behavioral  
539 choices (**Fig. 2-figure supplement 2C**); other time windows between 60-300 ms did not result in  
540 differences in the results reported here.

541 To quantify surround suppression in both psychophysics and neural responses, we first  
542 calculated  $d'$  for each stimulus size. The resulting size-tuning curves were fitted with the DoE  
543 function (64) (**Fig. 2B**):

$$544 \quad A_e \operatorname{erf}\left(\frac{x_c}{s_e}\right) - A_i \operatorname{erf}\left(\frac{x_c}{s_e + s_i}\right) + m$$

545 where  $A_e$  and  $A_i$  scale the height of the excitatory center and inhibitory surround, respectively,  $s_e$   
546 and  $s_i$  are the excitatory and inhibitory sizes, and  $m$  is the baseline firing rate of the cell, which is  
547 set to 0 for the psychophysical and neural selectivity functions.

548 The suppression index ( $SI_{neu}$ ) for each neuronal size tuning curve was then calculated as  
549  $SI_{neu} = (d_m - d_L)/d_m$ , where  $d_m$  is the maximum selectivity across responses to different stimulus  
550 sizes, and  $d_L$  is the selectivity observed at the largest size. The psychophysical suppression index  
551  $SI_{psy}$  was calculated analogously, using psychophysical selectivity rather than neuronal  
552 selectivity. Since using the raw responses is sensitive to noise at both the maximum response and  
553 the response at the largest size, we used the values from the DoE fits for SI calculations.

554 Choice probabilities (CP) were used to quantify the relationship between behavioral  
555 choice and response variability (21). For an identical stimulus, the responses can be grouped into  
556 two distributions based on whether the monkeys made the choice that corresponds to the  
557 neuron's preferred direction, or the null direction (**Fig. 2-figure supplement 2A**). As long as the  
558 monkeys made at least five choices for each direction, ROC values were calculated from these  
559 response distributions, and the area underneath the ROC curve was taken as the CP value (**Fig. 2-**  
560 **figure supplement 2B**). The single CP for each neuron was computed by averaging the CP  
561 across all stimulus conditions. The alternative method of z-scoring the data for each stimulus  
562 conditions and then combining them into a single pair of distributions for preferred and null  
563 choices can underestimate the CP when the number of choices for preferred and null directions  
564 differs across stimulus conditions (65).

565

#### 566 *Noise and signal correlations*

567 Noise correlation ( $r_{noise}$ ) was computed as the Pearson correlation coefficient (ranging from -1 to  
568 1) of the trial-by-trial responses of two simultaneously recorded neurons (1). For each size and  
569 direction combination, responses were z-scored by subtracting the mean response and dividing  
570 by the s.d. across stimulus repetitions. This operation removed the effect of size and direction on

571 the mean response, such that  $r_{\text{noise}}$  measured only correlated trial-to-trial fluctuations around the  
572 mean response. To prevent correlations driven by outliers, we only considered trials on which the  
573 responses were within  $\pm 3$  s.d. of the mean (1). We also normalized for slow changes in the  
574 responses in blocks of 20 trials (1).

575 Signal correlation ( $r_{\text{signal}}$ ) was computed as the Pearson correlation coefficient (ranging  
576 from -1 to 1) between size tuning curves of preferred and null directions for two simultaneously  
577 recorded neurons. Size tuning curves were constructed by plotting mean firing rates as a function  
578 of size for preferred and null directions. In addition, we calculated an alternative measure of  
579  $r_{\text{signal}}$  based on the similarity in direction tuning between the two neurons, and found similar  
580 trends between the neuron pairs (**Fig. 4-figure supplement 1D**).

581 As the measure of  $r_{\text{noise}}$  can depend on the firing rates of the neuron pairs (66), we created  
582 matched rate distributions of SS-SS and NS-NS pairs by subsampling from the original  
583 distributions in Fig. 4A. We first created distributions of the geometric means of SS-SS and NS-  
584 NS pairs and then resampled randomly to create sub-distributions with equal amounts of data in  
585 each bin (50). We resampled 10,000 times and calculated the slope of the  $r_{\text{noise}}$  vs.  $r_{\text{signal}}$  fit of  
586 each sub-distribution. The distribution of SS-SS and NS-NS slopes are shown in Fig. 4B.

587

588 *Simulations of population selectivity*

589 The data and Matlab code to generate Fig. 5C, D and E are available at

590 [http://packlab.mcgill.ca/suppression\\_data\\_and\\_code.zip](http://packlab.mcgill.ca/suppression_data_and_code.zip). For all simulations, we considered a

591 population of MT neurons with different receptive field positions and different preferences for

592 stimulus size. The RF locations were determined by fitting a spatial Gaussian to the neuronal

593 response over a 5 x 5 grid. For neurons with RFs within 5° radius of the stimulus center, the

594 responses to different sizes were taken from the size-tuning curves of the actual MT neurons. For  
595 neurons with RFs that were not within  $5^\circ$  radius of the stimulus center, we shifted the size-tuning  
596 curves by the same proportion as the RF offset, so that a larger stimulus was required to generate  
597 the equivalent level of activation. We estimated that the shift in the size-tuning curve is roughly  
598 proportional to the shift of the stimulus from the RF center. This was determined by measuring  
599 the size-tuning with the stimulus placed at different spatial locations (**Fig. 2-figure supplement**  
600 **1B, C**).

601         The number of neurons activated by each stimulus was determined using the previously  
602 measured cortical magnification in MT, Magnification factor =  $6 * \text{eccentricity}^{-0.9}$  (22, 23).  
603 This maps visual space in degrees into cortical space in millimeters. The integral of cortical  
604 space activation yields the cortical footprint (in square millimeters) as a function of stimulus  
605 size. The absolute number of neurons can then be obtained by multiplying the cortical footprint  
606 by a factor that indicates the number of neurons per millimeter. We set this factor to 20  
607 neurons/mm<sup>2</sup>, which yielded a range of pool sizes comparable to those used in other studies (2)  
608 (**Fig. 1B**). The range of pool sizes is in the regime where population sensitivity is saturated (**Fig.**  
609 **4-figure supplement 1B**). We verified that our results are robust with respect to this parameter  
610 re-running the simulations with a value of 40 neurons/mm<sup>2</sup>; the results were qualitatively similar  
611 to those reported here.

612

### 613 *Simulations of population coding*

614 All simulations involved extrapolations from the statistics of our neural recordings. To generate  
615 the size tuning curves for the preferred and null directions,  $S_i(s, \theta)$ , for each simulated neuron, we  
616 first used the distributions of DoE parameters from all neurons recorded during the



617 discrimination task to estimate the parameters of a multivariate Gaussian distribution. We then  
618 randomly sampled from this distribution to obtain DoE parameters that were subsequently  
619 converted to tuning curves. The variance,  $V_i(s, \theta)$ , for each simulated neuron, was generated by  
620 multiplying the  $S_i(s, \theta)$  with Fano factors randomly sampled from a Gaussian distribution  
621 estimated from the measured Fano factors. For each combination of size and direction in a  
622 simulated trial, the response of the  $i^{\text{th}}$  neuron was generated by randomly drawing a value from a  
623 Gaussian distribution having the same mean,  $S_i(s, \theta)$ , and variance,  $V_i(s, \theta)$ , as the generated  
624 tuning curve

$$625 \quad R_i(s, \theta) = S_i(s, \theta) + x_i \sqrt{V_i(s, \theta)}$$

626 where  $x$  is a vector of independent random deviates with zero mean and unit variance. This  
627 procedure generated a set of responses in which each neuron's noise was independent.

628 To reproduce the relationship between  $r_{\text{noise}}$ ,  $r_{\text{signal}}$  and surround suppression, the  
629 covariance matrix,  $r_{\text{noise}}$  between neurons  $i$  and  $j$  was assigned according to

$$630 \quad r_{\text{noise}(i,j)} = SI \text{ dependency}_{(i,j)} \times m \times r_{\text{signal}(i,j)} + b$$

631 where  $r_{\text{signal}}$  represents the signal correlation between size tuning curves of preferred and null  
632 directions for a pair of neurons. The slope  $m$  and intercept  $b$  were acquired from a linear  
633 regression fit to the measured relationship between  $r_{\text{noise}}$  and  $r_{\text{signal}}$  for all pairs of neurons. The *SI*  
634 *dependency* term was set to 1 in the no SI modulation condition (**Fig. 5C, E**, magenta). In the SI  
635 dependency condition (**Fig. 5C, E**, cyan) we estimated the dependency empirically from the data  
636 as,

$$637 \quad SI \text{ dependency}_{(i,j)} = 1.3(\max_{i,j}(SI_i + SI_j) - SI_i - SI_j - 2)$$

638 where  $SI_i$  and  $SI_j$  were the suppression indices for neurons  $i$  and  $j$ , respectively. When the joint SI  
639 of the neuron pairs is high, the value of *SI dependency* will be low, and vice versa, capturing the

640 modulation of the  $r_{noise}$  on  $r_{signal}$  slope by surround suppression. The constants, 1.3 and 2, were  
641 determined using a least squares method to obtain the closest slopes for the 3 groups of neuron  
642 pairs in Fig. 4A. In each iteration of the simulation, we sampled the noise correlation structure  
643 from a Wishart distribution with maximum variance around the empirical means.

644 After assuming the covariance matrix, the response simulation becomes

$$645 \quad R_i(s, \theta) = S_i(s, \theta) + y_i \sqrt{V_i(s, \theta)}$$

646 where  $y$  represents the product of the matrix square root of the covariance matrix with the vector  
647 of independent deviates,  $x$  (2, 38, 67). For each simulation, we generated 1,000 trials of  
648 responses for each neuron, each size, and each direction.

649

#### 650 *Decoding*

651 After generating the responses for 1000 trials for a fixed number of neurons,  $n$ , at each stimulus  
652 size, the 1000 responses in  $n$ -dimensional space were projected onto the axis that connects the  
653 mean responses. This subsequently generated 1D distributions for the preferred and null  
654 direction responses. The 1D distribution of preferred and null direction responses was  
655 normalized by their variance and the population  $d'$  was then computed while the decoder was  
656 blinded to their correlations (**Fig. 5B**). This is commonly referred to as a factorial decoder; the  
657 readout weights the responses depending on the neuronal sensitivity functions and not on their  
658 correlations (36).

659 In addition to this correlation-blind decoder (**Fig. 5**), we also explored the performance of  
660 an optimal linear estimator that considers not only the responses of neurons, but also the  
661 covariance matrix (54). The impact of the dependency between surround suppression and  
662 correlation structure is smaller, but still present (**Fig. 5-figure supplement 2**).

663

664 **Acknowledgements**

665 This work was supported by grants from the Ministère du Développement économique de  
666 l'Innovation et de l'Exportation (C.C.P.) and Canadian Institutes of Health Research (MOP-  
667 115178 (C.C.P.) and CGSD-121719 (L.D.L.)). We would like to thank Julie Coursol and the  
668 staff of the Animal Care Facility (Montreal Neurological Institute) for excellent technical  
669 support, and R. Born for comments on earlier versions of the manuscript.

670

## References

- 671  
672  
673 1. Zohary E, Shadlen MN, & Newsome WT (1994) Correlated neuronal discharge rate and  
674 its implications for psychophysical performance. *Nature* 370(6485):140-143.
- 675 2. Shadlen MN, Britten KH, Newsome WT, & Movshon JA (1996) A computational  
676 analysis of the relationship between neuronal and behavioral responses to visual motion. *J*  
677 *Neurosci* 16(4):1486-1510.
- 678 3. Abbott LF & Dayan P (1999) The effect of correlated variability on the accuracy of a  
679 population code. *Neural Comput* 11(1):91-101.
- 680 4. Sompolinsky H, Yoon H, Kang K, & Shamir M (2001) Population coding in neuronal  
681 systems with correlated noise. *Phys Rev E Stat Nonlin Soft Matter Phys* 64(5 Pt 1):051904.
- 682 5. Panzeri S, Schultz SR, Treves A, & Rolls ET (1999) Correlations and the encoding of  
683 information in the nervous system. *Proc Biol Sci* 266(1423):1001-1012.
- 684 6. Averbeck BB, Latham PE, & Pouget A (2006) Neural correlations, population coding  
685 and computation. *Nat Rev Neurosci* 7(5):358-366.
- 686 7. Ecker AS, Berens P, Tolias AS, & Bethge M (2011) The effect of noise correlations in  
687 populations of diversely tuned neurons. *J Neurosci* 31(40):14272-14283.
- 688 8. Tadin D, Lappin JS, Gilroy LA, & Blake R (2003) Perceptual consequences of centre-  
689 surround antagonism in visual motion processing. *Nature* 424(6946):312-315.
- 690 9. Tadin D, *et al.* (2006) Weakened center-surround interactions in visual motion processing  
691 in schizophrenia. *J Neurosci* 26(44):11403-11412.
- 692 10. Golomb JD, *et al.* (2009) Enhanced visual motion perception in major depressive  
693 disorder. *J Neurosci* 29(28):9072-9077.

- 694 11. Melnick MD, Harrison BR, Park S, Bennetto L, & Tadin D (2013) A strong interactive  
695 link between sensory discriminations and intelligence. *Curr Biol* 23(11):1013-1017.
- 696 12. Churan J, Khawaja FA, Tsui JM, & Pack CC (2008) Brief motion stimuli preferentially  
697 activate surround-suppressed neurons in macaque visual area MT. *Curr Biol* 18(22):R1051-1052.
- 698 13. Pelli DG (1985) Uncertainty explains many aspects of visual contrast detection and  
699 discrimination. *J Opt Soc Am A* 2(9):1508-1532.
- 700 14. Burr DC, Baldassi S, Morrone MC, & Verghese P (2009) Pooling and segmenting motion  
701 signals. *Vision Res* 49(10):1065-1072.
- 702 15. Beck JM, Ma WJ, Pitkow X, Latham PE, & Pouget A (2012) Not noisy, just wrong: the  
703 role of suboptimal inference in behavioral variability. *Neuron* 74(1):30-39.
- 704 16. Gold JI & Shadlen MN (2007) The neural basis of decision making. *Annu Rev Neurosci*  
705 30:535-574.
- 706 17. Moreno-Bote R, *et al.* (2014) Information-limiting correlations. *Nat Neurosci*  
707 17(10):1410-1417.
- 708 18. Snyder AC, Morais MJ, Kohn A, & Smith MA (2014) Correlations in V1 are reduced by  
709 stimulation outside the receptive field. *J Neurosci* 34(34):11222-11227.
- 710 19. Cohen MR & Newsome WT (2008) Context-dependent changes in functional circuitry in  
711 visual area MT. *Neuron* 60(1):162-173.
- 712 20. Britten KH, Shadlen MN, Newsome WT, & Movshon JA (1992) The analysis of visual  
713 motion: a comparison of neuronal and psychophysical performance. *J Neurosci* 12(12):4745-  
714 4765.

- 715 21. Britten KH, Newsome WT, Shadlen MN, Celebrini S, & Movshon JA (1996) A  
716 relationship between behavioral choice and the visual responses of neurons in macaque MT. *Vis*  
717 *Neurosci* 13(1):87-100.
- 718 22. Van Essen DC, Maunsell JH, & Bixby JL (1981) The middle temporal visual area in the  
719 macaque: myeloarchitecture, connections, functional properties and topographic organization. *J*  
720 *Comp Neurol* 199(3):293-326.
- 721 23. Erickson RG, Dow BM, & Snyder AZ (1989) Representation of the fovea in the superior  
722 temporal sulcus of the macaque monkey. *Exp Brain Res* 78(1):90-112.
- 723 24. Born RT & Bradley DC (2005) Structure and function of visual area MT. *Annu Rev*  
724 *Neurosci* 28:157-189.
- 725 25. Allman J, Miezin F, & McGuinness E (1985) Stimulus specific responses from beyond  
726 the classical receptive field: neurophysiological mechanisms for local-global comparisons in  
727 visual neurons. *Annu Rev Neurosci* 8:407-430.
- 728 26. Pack CC, Hunter JN, & Born RT (2005) Contrast dependence of suppressive influences  
729 in cortical area MT of alert macaque. *J Neurophysiol* 93(3):1809-1815.
- 730 27. Born RT & Tootell RB (1992) Segregation of global and local motion processing in  
731 primate middle temporal visual area. *Nature* 357(6378):497-499.
- 732 28. Born RT, Groh JM, Zhao R, & Lukasewycz SJ (2000) Segregation of object and  
733 background motion in visual area MT: effects of microstimulation on eye movements. *Neuron*  
734 26(3):725-734.
- 735 29. Berezovskii VK & Born RT (2000) Specificity of projections from wide-field and local  
736 motion-processing regions within the middle temporal visual area of the owl monkey. *J Neurosci*  
737 20(3):1157-1169.

- 738 30. Nienborg H, Cohen MR, & Cumming BG (2012) Decision-related activity in sensory  
739 neurons: correlations among neurons and with behavior. *Annu Rev Neurosci* 35:463-483.
- 740 31. Haefner RM, Gerwinn S, Macke JH, & Bethge M (2013) Inferring decoding strategies  
741 from choice probabilities in the presence of correlated variability. *Nat Neurosci* 16(2):235-242.
- 742 32. Bair W, Zohary E, & Newsome WT (2001) Correlated firing in macaque visual area MT:  
743 time scales and relationship to behavior. *J Neurosci* 21(5):1676-1697.
- 744 33. Huang X & Lisberger SG (2009) Noise correlations in cortical area MT and their  
745 potential impact on trial-by-trial variation in the direction and speed of smooth-pursuit eye  
746 movements. *J Neurophysiol* 101(6):3012-3030.
- 747 34. Glasser DM, Tsui JM, Pack CC, & Tadin D (2011) Perceptual and neural consequences  
748 of rapid motion adaptation. *Proc Natl Acad Sci U S A* 108(45):E1080-1088.
- 749 35. Smolyanskaya A, Haefner RM, Lomber SG, & Born RT (2015) A Modality-Specific  
750 Feedforward Component of Choice-Related Activity in MT. *Neuron* 87(1):208-219.
- 751 36. Pitkow X, Liu S, Angelaki DE, DeAngelis GC, & Pouget A (2015) How Can Single  
752 Sensory Neurons Predict Behavior? *Neuron* 87(2):411-423.
- 753 37. Law CT & Gold JI (2009) Reinforcement learning can account for associative and  
754 perceptual learning on a visual-decision task. *Nat Neurosci* 12(5):655-663.
- 755 38. Cohen MR & Newsome WT (2009) Estimates of the contribution of single neurons to  
756 perception depend on timescale and noise correlation. *J Neurosci* 29(20):6635-6648.
- 757 39. Vinje WE & Gallant JL (2002) Natural stimulation of the nonclassical receptive field  
758 increases information transmission efficiency in V1. *J Neurosci* 22(7):2904-2915.
- 759 40. Gutnisky DA & Dragoi V (2008) Adaptive coding of visual information in neural  
760 populations. *Nature* 452(7184):220-224.

- 761 41. Gu Y, *et al.* (2011) Perceptual learning reduces interneuronal correlations in macaque  
762 visual cortex. *Neuron* 71(4):750-761.
- 763 42. Cohen MR & Maunsell JH (2009) Attention improves performance primarily by reducing  
764 interneuronal correlations. *Nat Neurosci* 12(12):1594-1600.
- 765 43. Mitchell JF, Sundberg KA, & Reynolds JH (2009) Spatial attention decorrelates intrinsic  
766 activity fluctuations in macaque area V4. *Neuron* 63(6):879-888.
- 767 44. Treue S & Martinez Trujillo JC (1999) Feature-based attention influences motion  
768 processing gain in macaque visual cortex. *Nature* 399(6736):575-579.
- 769 45. Sundberg KA, Mitchell JF, & Reynolds JH (2009) Spatial attention modulates center-  
770 surround interactions in macaque visual area v4. *Neuron* 61(6):952-963.
- 771 46. Kohn A & Smith MA (2005) Stimulus dependence of neuronal correlation in primary  
772 visual cortex of the macaque. *J Neurosci* 25(14):3661-3673.
- 773 47. Reynolds JH & Heeger DJ (2009) The normalization model of attention. *Neuron*  
774 61(2):168-185.
- 775 48. Tripp BP (2012) Decorrelation of spiking variability and improved information transfer  
776 through feedforward divisive normalization. *Neural Comput* 24(4):867-894.
- 777 49. Wiechert MT, Judkewitz B, Riecke H, & Friedrich RW (2010) Mechanisms of pattern  
778 decorrelation by recurrent neuronal circuits. *Nat Neurosci* 13(8):1003-1010.
- 779 50. Ruff DA & Cohen MR (2014) Attention can either increase or decrease spike count  
780 correlations in visual cortex. *Nat Neurosci* 17(11):1591-1597.
- 781 51. Qian N & Andersen RA (1994) Transparent motion perception as detection of  
782 unbalanced motion signals. II. Physiology. *J Neurosci* 14(12):7367-7380.



- 783 52. Tsui JM, Hunter JN, Born RT, & Pack CC (2010) The role of V1 surround suppression in  
784 MT motion integration. *J Neurophysiol* 103(6):3123-3138.
- 785 53. Herrmann K, Montaser-Kouhsari L, Carrasco M, & Heeger DJ (2010) When size matters:  
786 attention affects performance by contrast or response gain. *Nat Neurosci* 13(12):1554-1559.
- 787 54. Salinas E & Abbott LF (1994) Vector reconstruction from firing rates. *J Comput*  
788 *Neurosci* 1(1-2):89-107.
- 789 55. Tadin D, Silvanto J, Pascual-Leone A, & Battelli L (2011) Improved motion perception  
790 and impaired spatial suppression following disruption of cortical area MT/V5. *J Neurosci*  
791 31(4):1279-1283.
- 792 56. Waterston ML & Pack CC (2010) Improved discrimination of visual stimuli following  
793 repetitive transcranial magnetic stimulation. *PLoS One* 5(4):e10354.
- 794 57. Carandini M & Heeger DJ (2012) Normalization as a canonical neural computation. *Nat*  
795 *Rev Neurosci* 13(1):51-62.
- 796 58. Renart A, *et al.* (2010) The asynchronous state in cortical circuits. *Science*  
797 327(5965):587-590.
- 798 59. Betts LR, Taylor CP, Sekuler AB, & Bennett PJ (2005) Aging reduces center-surround  
799 antagonism in visual motion processing. *Neuron* 45(3):361-366.
- 800 60. Osborne LC, Lisberger SG, & Bialek W (2005) A sensory source for motor variation.  
801 *Nature* 437(7057):412-416.
- 802 61. Hohl SS, Chaisanguanthum KS, & Lisberger SG (2013) Sensory population decoding for  
803 visually guided movements. *Neuron* 79(1):167-179.
- 804 62. Lettvin JY, Maturana HR, McCulloch WS, & Pitts WH (1959) What the frog's eye tells  
805 the frog's brain. *Proc Inst Radio Engr* 47:1940-1951.

- 806 63. Green DM & Swets JA (1966) *Signal detection theory and psychophysics* (Wiley New  
807 York).
- 808 64. DeAngelis GC & Uka T (2003) Coding of horizontal disparity and velocity by MT  
809 neurons in the alert macaque. *J Neurophysiol* 89(2):1094-1111.
- 810 65. Kang I & Maunsell JH (2012) Potential confounds in estimating trial-to-trial correlations  
811 between neuronal response and behavior using choice probabilities. *J Neurophysiol*  
812 108(12):3403-3415.
- 813 66. Cohen MR & Kohn A (2011) Measuring and interpreting neuronal correlations. *Nat*  
814 *Neurosci* 14(7):811-819.
- 815 67. Liu S, Gu Y, DeAngelis GC, & Angelaki DE (2013) Choice-related activity and  
816 correlated noise in subcortical vestibular neurons. *Nat Neurosci* 16(1):89-97.  
817
